# Supplementary material for: Terpene synthases and pathways in animals: enzymology and structural evolution in the biosynthesis of volatile infochemicals
Source: Royal Society of Chemistry journal article supplement (doi:10.1039/d2np00076h), 2023-01-01
Supplement: d2np00076h1.xlsx [file d2np00076h1.xlsx]

## Sheet: Sheet1
Supplementary Tabl 1
Image credits
Figure 6
Image	Source	Licensing	Author(s)	Use conditions
Megacrania batesii	https://commons.wikimedia.org/wiki/File:Megacrania.batesii.1.jpg	Attribution-ShareAlike 3.0 Unported (CC BY-SA 3.0) - https://creativecommons.org/licenses/by-sa/3.0/deed.en	Sarefo (wikimedia commons username)	cropped and background removed
Graeffea crouanii	https://commons.wikimedia.org/wiki/File:Coconutstick.jpg	Attribution-ShareAlike 3.0 Unported (CC BY-SA 3.0) - https://creativecommons.org/licenses/by-sa/3.0/deed.en	Tauʻolunga (wikimedia commons username)	cropped and background removed
Periplaneta americana	https://commons.wikimedia.org/wiki/File:American-cockroach.jpg	Attribution-ShareAlike 3.0 Unported (CC BY-SA 3.0) - https://creativecommons.org/licenses/by-sa/3.0/deed.en	Gary Alpert	cropped and background removed
Nasutitermes corniger	https://commons.wikimedia.org/wiki/File:Termites_(Nasutitermes_corniger)_(8371245976).jpg	Attribution-ShareAlike 2.0 Generic (CC BY-SA 2.0)	Bernard DuPont	cropped and background removed
Frankliniella occidentalis	https://commons.wikimedia.org/wiki/File:Thrips_tabaci,_Frankliniella_occidentalis.jpg	Attribution 3.0 Unported (CC BY 3.0)	Alton N. Sparks, Jr.	cropped and background removed
Gynaikothrips uzeli	https://ucanr.edu/blogs/blogcore/postdetail.cfm?postnum=13227		Gevork Arakelian, Senior Biologist, Los Angeles County	cropped and background removed
Aspidiotus nerii	https://commons.wikimedia.org/wiki/File:Aspidiotus_nerii_from_CSIRO.jpg	Public domain (Australia)	Unknown	cropped and background removed
Murgantia histrionica	from Rebholz et al., 2023, Insect Biochem. Mol. Biol., 152, 103879.
Solenopsis invicta	https://commons.wikimedia.org/wiki/File:Fire_ants_01.jpg	Public domain	Stephen Ausmus	cropped and background removed
Bombus terrestris	https://commons.wikimedia.org/wiki/File:Bombus_terrestris.jpg	Public domain	Marco Almbauer	cropped and background removed
Harmonia axyridis	https://commons.wikimedia.org/wiki/File:Harmonia-axyridis-08-fws.jpg	Public domain	Francisco Welter-Schultes	cropped and background removed
Phaedon cochleariae	https://www.eurekalert.org/multimedia/585961		Dr. Sindy Frick, MPI for Chemical Ecology	cropped and background removed
Papilio polytes	https://commons.wikimedia.org/wiki/File:Common_Mormon_Caterpillar_Osmeterium_by_Dr._Raju_Kasambe_DSCN0792_(5).jpg	Attribution-ShareAlike 4.0 International (CC BY-SA 4.0) - https://creativecommons.org/licenses/by-sa/4.0/deed.en	Dr. Raju Kasambe	cropped and background removed
Heliconius melpomene	https://commons.wikimedia.org/wiki/File:Postman-butterfly.jpg		Haui Ared	cropped and background removed
Ceratitus capitata	https://commons.wikimedia.org/wiki/File:Mediterranean_Fruit_Fly_Female_(8543655858).jpg	Attribution 2.0 Generic (CC BY 2.0) - https://creativecommons.org/licenses/by/2.0/deed.en	Katja Schulz	cropped and background removed
Lutzomyia longipalpis	https://commons.wikimedia.org/wiki/File:Lutzomyia_longipalpis-sandfly.jpg	Attribution 2.5 Generic (CC BY 2.5) - https://creativecommons.org/licenses/by/2.5/deed.en	Ray Wilson	cropped and background removed
Figure 8/Graphical abstract
Image	Source	Licensing	Author(s)	Modifications
Octocoral	https://freesvg.org/coral2	Public Domain		cropped and background removed
Mantellid frog	https://commons.wikimedia.org/wiki/File:Golden_Mantelle_(Mantella_aurantiaca),_Torotorofotsy_marshes,_Madagascar_(13795093335).jpg	Attribution 2.0 Generic (CC BY 2.0) - https://creativecommons.org/licenses/by/2.0/	photographed by Frank Vassen	cropped and background removed
Alligator	https://www.publicdomainpictures.net/en/view-image.php?image=415169&picture=alligator	Public Domain	photographed by John Thorne	cropped and background removed
Springbok	https://commons.wikimedia.org/wiki/File:The_book_of_antelopes_(1894)_Antidorcas_euchore_(white_background).png	Public Domain	photographed by Philip Sclater	cropped and background removed
Sea hare	https://commons.wikimedia.org/wiki/File:202204_Sea_hare.svg	Creative Commons Attribution 4.0 International - https://creativecommons.org/licenses/by/4.0/	DataBase Center for Life Science (DBCLS)	cropped and background removed
Dust mite	https://freesvg.org/yellow-mite-tydeidae-lorryia-formosa-2-edit-2016121839	Public Domain	Photo by Eric Erbe; digital colorization by Chris Pooley.	cropped and background removed
Millipede	https://commons.wikimedia.org/wiki/File:Octoglena_sierra_(Family_Polyzoniidae)_(3405605943).jpg	Creative Commons Attribution 4.0 International - https://creativecommons.org/licenses/by/4.0/	photographed by Marshal Hedin	cropped and background removed
Harlequin bug	from Rebholz et al., 2023, Insect Biochem. Mol. Biol., 152, 103879.
Figure 9
Acyrthosiphon pisum	https://bugguide.net/node/view/1195272		photographed by Salvador Vitanza, Entomologist (used with permission)	cropped and background removed
Figure 10
Ips pini	https://www.insectimages.org/browse/detail.cfm?imgnum=5208086	https://creativecommons.org/licenses/by/3.0/us/	Natasha Wright, Braman Termite & Pest Elimination, Bugwood.org	cropped and background removed
Phyllotreta striolata	https://bugguide.net/node/view/1113466	https://creativecommons.org/licenses/by-nd-nc/1.0/	photographed by Mike Quinn, TexasEnto.net	cropped and background removed
Figure 12 and 13
Halyomorpha halys	from Rebholz et al., 2023, Insect Biochem. Mol. Biol., 152, 103879.
Murgantia histrionica	from Rebholz et al., 2023, Insect Biochem. Mol. Biol., 152, 103879.
Nezara viridula	from Rebholz et al., 2023, Insect Biochem. Mol. Biol., 152, 103879.
Figure 14
Phenacoccus solenopsis	https://www.forestryimages.org/browse/detail.cfm?imgnum=5114018	https://creativecommons.org/licenses/by-nc/3.0/us/	United States National Collection of Scale Insects Photographs, USDA Agricultural Research Service, Bugwood.org	cropped and background removed
Boisea trivittata	https://www.forestryimages.org/browse/detail.cfm?imgnum=1386011	https://creativecommons.org/licenses/by/3.0/us/	photographed by Joseph Berger, Bugwood.org	cropped and background removed
Sehirus cinctus	https://commons.wikimedia.org/wiki/File:Sehirus_cinctus.jpg	Public Domain	photographed by Kaldari	cropped and background removed
Podisus maculiventris	https://www.forestryimages.org/browse/detail.cfm?imgnum=5619397	https://creativecommons.org/licenses/by-nc/3.0/us/	Rebekah D. Wallace, University of Georgia, Bugwood.org	cropped and background removed
