# Supplementary material for: Terpene synthases and pathways in animals: enzymology and structural evolution in the biosynthesis of volatile infochemicals
Source: Royal Society of Chemistry journal article supplement (doi:10.1039/d2np00076h), 2023-01-01
Supplement: d2np00076h2.pdf [file d2np00076h2.pdf]

Supplementary Table 1

Image credits

Figure 6

| Image                             | Source                                                                                                                                    | Licensing                                | Author(s)                                              | Use conditions                 |
|-----------------------------------|-------------------------------------------------------------------------------------------------------------------------------------------|------------------------------------------|--------------------------------------------------------|--------------------------------|
| <i>Megacrania batesii</i>         | <a href="https://commons.wikimedia.org/wiki/File:Mega">https://commons.wikimedia.org/wiki/File:Mega</a>                                   | Attribution-ShareAlike 3.0 Unported      | Sarefo (wikimedia commons username)                    | cropped and background removed |
| <i>Graeffea crouanii</i>          | <a href="https://commons.wikimedia.org/wiki/File:Cocor">https://commons.wikimedia.org/wiki/File:Cocor</a>                                 | Attribution-ShareAlike 3.0 Unported      | Tau'olunga (wikimedia commons username)                | cropped and background removed |
| <i>Periplaneta americana</i>      | <a href="https://commons.wikimedia.org/wiki/File:Amer">https://commons.wikimedia.org/wiki/File:Amer</a>                                   | Attribution-ShareAlike 3.0 Unported      | Gary Alpert                                            | cropped and background removed |
| <i>Nasutitermes corniger</i>      | <a href="https://commons.wikimedia.org/wiki/File:Termi">https://commons.wikimedia.org/wiki/File:Termi</a>                                 | Attribution-ShareAlike 2.0 Generic       | Bernard DuPont                                         | cropped and background removed |
| <i>Frankliniella occidentalis</i> | <a href="https://commons.wikimedia.org/wiki/File:Thrip">https://commons.wikimedia.org/wiki/File:Thrip</a>                                 | Attribution 3.0 Unported (CC BY)         | Alton N. Sparks, Jr.                                   | cropped and background removed |
| <i>Gynaikothrips uzeli</i>        | <a href="https://ucanr.edu/blogs/blogcore/postdetail.cfm?postnum=13227">https://ucanr.edu/blogs/blogcore/postdetail.cfm?postnum=13227</a> |                                          | Gevork Arakelian, Senior Biologist, Los Angeles County | cropped and background removed |
| <i>Aspidiotus nerii</i>           | <a href="https://commons.wikimedia.org/wiki/File:Aspid">https://commons.wikimedia.org/wiki/File:Aspid</a>                                 | Public domain (Australia)                | Unknown                                                | cropped and background removed |
| <i>Murgantia histrionica</i>      | from Rebholz et al., 2023, Insect Biochem. Mol. Biol., 152, 103879.                                                                       |                                          |                                                        | cropped and background removed |
| <i>Solenopsis invicta</i>         | <a href="https://commons.wikimedia.org/wiki/File:Fire_">https://commons.wikimedia.org/wiki/File:Fire_</a>                                 | Public domain                            | Stephen Ausmus                                         | cropped and background removed |
| <i>Bombus terrestris</i>          | <a href="https://commons.wikimedia.org/wiki/File:Bomb">https://commons.wikimedia.org/wiki/File:Bomb</a>                                   | Public domain                            | Marco Almbauer                                         | cropped and background removed |
| <i>Harmonia axyridis</i>          | <a href="https://commons.wikimedia.org/wiki/File:Harm">https://commons.wikimedia.org/wiki/File:Harm</a>                                   | Public domain                            | Francisco Welter-Schultes                              | cropped and background removed |
| <i>Phaedon cochleariae</i>        | <a href="https://www.eurekalert.org/multimedia/585961">https://www.eurekalert.org/multimedia/585961</a>                                   |                                          | Dr. Sindy Frick, MPI for Chemical Ecology              | cropped and background removed |
| <i>Papilio polytes</i>            | <a href="https://commons.wikimedia.org/wiki/File:Comn">https://commons.wikimedia.org/wiki/File:Comn</a>                                   | Attribution-ShareAlike 4.0 International | Dr. Raju Kasambe                                       | cropped and background removed |
| <i>Heliconia melpomene</i>        | <a href="https://commons.wikimedia.org/wiki/File:Postman-butterfly.jpg">https://commons.wikimedia.org/wiki/File:Postman-butterfly.jpg</a> |                                          | Hauil Ared                                             | cropped and background removed |
| <i>Ceratitis capitata</i>         | <a href="https://commons.wikimedia.org/wiki/File:Medit">https://commons.wikimedia.org/wiki/File:Medit</a>                                 | Attribution 2.0 Generic (CC BY)          | Katja Schulz                                           | cropped and background removed |
| <i>Lutzomyia longipalpis</i>      | <a href="https://commons.wikimedia.org/wiki/File:Lutzo">https://commons.wikimedia.org/wiki/File:Lutzo</a>                                 | Attribution 2.5 Generic (CC BY)          | Ray Wilson                                             | cropped and background removed |

Figure 8/Graphical abstract

| Image          | Source                                                                                                          | Licensing                       | Author(s)                                                 | Modifications                  |
|----------------|-----------------------------------------------------------------------------------------------------------------|---------------------------------|-----------------------------------------------------------|--------------------------------|
| Octocoral      | <a href="https://freesvg.org/coral2">https://freesvg.org/coral2</a>                                             | Public Domain                   |                                                           | cropped and background removed |
| Mantellid frog | <a href="https://commons.wikimedia.org/wiki/File:Golde">https://commons.wikimedia.org/wiki/File:Golde</a>       | Attribution 2.0 Generic (CC BY) | photographed by Frank Vassen                              | cropped and background removed |
| Alligator      | <a href="https://www.publicdomainpictures.net/en/view">https://www.publicdomainpictures.net/en/view</a>         | Public Domain                   | photographed by John Thorne                               | cropped and background removed |
| Springbok      | <a href="https://commons.wikimedia.org/wiki/File:The_t">https://commons.wikimedia.org/wiki/File:The_t</a>       | Public Domain                   | photographed by Philip Sclater                            | cropped and background removed |
| Sea hare       | <a href="https://commons.wikimedia.org/wiki/File:2022">https://commons.wikimedia.org/wiki/File:2022</a>         | Creative Commons Attribution    | Database Center for Life Science (DBCLS)                  | cropped and background removed |
| Dust mite      | <a href="https://freesvg.org/yellow-mite-tydeidae-lorryie">https://freesvg.org/yellow-mite-tydeidae-lorryie</a> | Public Domain                   | Photo by Eric Erbe; digital colorization by Chris Pooley. | cropped and background removed |
| Millipede      | <a href="https://commons.wikimedia.org/wiki/File:Octog">https://commons.wikimedia.org/wiki/File:Octog</a>       | Creative Commons Attribution    | photographed by Marshal Hedin                             | cropped and background removed |
| Harlequin bug  | from Rebholz et al., 2023, Insect Biochem. Mol. Biol., 152, 103879.                                             |                                 |                                                           | cropped and background removed |

Figure 9

|                           |                                                                                             |  |                                                                       |                                |
|---------------------------|---------------------------------------------------------------------------------------------|--|-----------------------------------------------------------------------|--------------------------------|
| <i>Acyrtosiphon pisum</i> | <a href="https://bugguide.net/node/view/1195272">https://bugguide.net/node/view/1195272</a> |  | photographed by Salvador Vitanza, Entomologist (used with permission) | cropped and background removed |
|---------------------------|---------------------------------------------------------------------------------------------|--|-----------------------------------------------------------------------|--------------------------------|

Figure 10

|                              |                                                                                                             |                                                                                                         |                                                                |                                |
|------------------------------|-------------------------------------------------------------------------------------------------------------|---------------------------------------------------------------------------------------------------------|----------------------------------------------------------------|--------------------------------|
| <i>Ips pini</i>              | <a href="https://www.insectimages.org/browse/detail.cfm">https://www.insectimages.org/browse/detail.cfm</a> | <a href="https://creativecommons.org/licenses/by/4.0/">https://creativecommons.org/licenses/by/4.0/</a> | Natasha Wright, Braman Termite & Pest Elimination, Bugwood.org | cropped and background removed |
| <i>Phyllotreta striolata</i> | <a href="https://bugguide.net/node/view/1113466">https://bugguide.net/node/view/1113466</a>                 | <a href="https://creativecommons.org/licenses/by/4.0/">https://creativecommons.org/licenses/by/4.0/</a> | photographed by Mike Quinn, TexasEnto.net                      | cropped and background removed |

Figure 12 and 13

|                              |                                                                     |
|------------------------------|---------------------------------------------------------------------|
| <i>Halyomorpha halys</i>     | from Rebholz et al., 2023, Insect Biochem. Mol. Biol., 152, 103879. |
| <i>Murgantia histrionica</i> | from Rebholz et al., 2023, Insect Biochem. Mol. Biol., 152, 103879. |
| <i>Nezara viridula</i>       | from Rebholz et al., 2023, Insect Biochem. Mol. Biol., 152, 103879. |

Figure 14

|                               |                                                                                                                 |                                                                                                         |                                                                                                    |                                |
|-------------------------------|-----------------------------------------------------------------------------------------------------------------|---------------------------------------------------------------------------------------------------------|----------------------------------------------------------------------------------------------------|--------------------------------|
| <i>Phenacoccus solenopsis</i> | <a href="https://www.forestryimages.org/browse/detail.cfm">https://www.forestryimages.org/browse/detail.cfm</a> | <a href="https://creativecommons.org/licenses/by/4.0/">https://creativecommons.org/licenses/by/4.0/</a> | United States National Collection of Scale Insects Photographs, USDA Agricultural Research Service | cropped and background removed |
| <i>Boisea trivittata</i>      | <a href="https://www.forestryimages.org/browse/detail.cfm">https://www.forestryimages.org/browse/detail.cfm</a> | <a href="https://creativecommons.org/licenses/by/4.0/">https://creativecommons.org/licenses/by/4.0/</a> | photographed by Joseph Berger, Bugwood.org                                                         | cropped and background removed |
| <i>Sehirus cinctus</i>        | <a href="https://commons.wikimedia.org/wiki/File:Sehir">https://commons.wikimedia.org/wiki/File:Sehir</a>       | Public Domain                                                                                           | photographed by Kaldari                                                                            | cropped and background removed |
| <i>Padisus maculiventris</i>  | <a href="https://www.forestryimages.org/browse/detail.cfm">https://www.forestryimages.org/browse/detail.cfm</a> | <a href="https://creativecommons.org/licenses/by/4.0/">https://creativecommons.org/licenses/by/4.0/</a> | Rebekah D. Wallace, University of Georgia, Bugwood.org                                             | cropped and background removed |
